# Supplementary material for: Optimising the secondary analysis of primary health care country case studies: qualitative meta-analysis of 52 country cases through a sexual and reproductive health and rights lens
Source: Research Square preprint supplement (doi:10.21203/rs.3.rs-6516698/v1), 2025-05-09
Supplement: Supplementary file 1 [file 415507d18423ec218e837ee1.docx]

**Optimising the secondary analysis of primary health care country case studies: qualitative meta-analysis of 52 country cases through a sexual and reproductive health and rights lens**

**Supplementary file 1: Overview of country case study sample**

| **Country case studies** | | | | **Maternal mortality**  (per 100 000) | | **Infant mortality**  (per 1000 live births) | | **Under-5 mortality**  (per 1000 live births) | | **HIV prevalence among adults 15-49** (%) | | **Reproductive cancers**  (crude incidence per 100 000) | | |
| --- | --- | --- | --- | --- | --- | --- | --- | --- | --- | --- | --- | --- | --- | --- |
| **#** | **Country** | **Region** | **Series** | **2017** | **2020** | **2017** | **2021** | **2017** | **2021** | **2015** | **2022** | **Breast2020** | **Cervical 2020** | **Prostate 2020** |
| 1 | Afghanistan | EMRO | [PHC/COVID](https://ahpsr.who.int/publications/i/item/afghanistan-a-primary-health-care-case-study-in-the-context-of-the-covid-19-pandemic) | 682 | 620 | 39.57 | 43.39 | 64.58 | 55.66 | <0.1 | <0.1 | 16.7 | 6.3 | 2.3 |
| 2 | Bangladesh | SEARO | [PRIMASYS](https://apps.who.int/iris/bitstream/handle/10665/341106/WHO-HIS-HSR-17.35-eng.pdf?sequence=1&isAllowed=y) | 183 | 123 | 28.1 | 22.91 | 34.07 | 27.27 | <0.1 | <0.1 | 16 | 10.2 | 2.9 |
| 3 | Bhutan | SEARO | [PHC/COVID](https://ahpsr.who.int/publications/i/item/bhutan-a-primary-health-care-case-study-in-the-context-of-the-covid-19-pandemic) | 443 | 438 | 25.51 | 22.45 | 30.64 | 26.69 | 0.2 | 0.2 | 4.4 | 13 | 0.73 |
| 4 | Cameroon | AFRO | [PRIMASYS](https://apps.who.int/iris/handle/10665/341179) | 68 | 60 | 53.24 | 46.95 | 80.8 | 69.79 | 3.6 | 2.6 | 31.4 | 20.9 | 16.5 |
| 5 | Colombia | PAHO | [PRIMASYS](https://apps.who.int/iris/handle/10665/341066) | 71 | 75 | 12.58 | 11.06 | 14.62 | 12.85 | 0.4 | 0.5 | 59.9 | 18.3 | 57.9 |
| 6 | Democratic Republic of Congo | AFRO | SRHR draft | 570 | 547 | 69.53 | 62.37 | 90.26 | 78.96 | 0.8 | 0.6 | 16.2 | 17.3 | 16.7 |
| 7 | Dominica | PAHO | SRHR draft | no data | | 29.82 | 32.03 | 33.6 | 35.89 | no data | | no data | | |
| 8 | Egypt | EMRO | SRHR draft | 20 | 17 | 18.56 | 16.23 | 21.78 | 18.96 | <0.1 | <0.1 | 43.5 | 2.6 | 9.2 |
| 9 | Ethiopia | AFRO | [PRIMASYS](https://ahpsr.who.int/publications/i/item/primasys-comprehensive-case-study-from-ethiopia) & [PHC/COVID](https://ahpsr.who.int/publications/i/item/ethiopia-a-primary-health-care-case-study-in-the-context-of-the-covid-19-pandemic) | 348 | 267 | 39.57 | 34.27 | 55.97 | 46.81 | 1.2 | 0.8 | 28.1 | 13 | 4.7 |
| 10 | Georgia | EURO | [PRIMASYS](https://apps.who.int/iris/handle/10665/341167) | 26 | 28 | 8.9 | 8.43 | 10 | 9.48 | 0.2 | 0.3 | 93 | 15.7 | 52.8 |
| 11 | Ghana | AFRO | [PRIMASYS](https://apps.who.int/iris/handle/10665/326258) & [PHC/COVID](https://ahpsr.who.int/publications/i/item/ghana-a-primary-health-care-case-study-in-the-context-of-the-covid-19-pandemic) | 274 | 263 | 36.71 | 32.58 | 21.02 | 43.97 | 1.8 | 1.7 | 29.3 | 18.3 | 13.5 |
| 12 | Indonesia | SEARO | [PRIMASYS](https://apps.who.int/iris/handle/10665/341076) & [PHC/COVID](https://ahpsr.who.int/publications/i/item/indonesia-a-primary-health-care-case-study-in-the-context-of-the-covid-19-pandemic) | 194 | 173 | 21.58 | 18.88 | 25.57 | 22.17 | 0.4 | 0.3 | 48.5 | 27 | 9.8 |
| 13 | Iran (Islamic Republic of) | EMRO | [PHC/COVID](https://ahpsr.who.int/publications/i/item/the-islamic-republic-of-iran-a-primary-health-care-case-study-in-the-context-of-the-covid-19-pandemic) | 18 | 22 | 12.45 | 10.87 | 14.46 | 12.63 | <0.1 | <0.1 | 40.8 | 2.5 | 21.1 |
| 14 | Jordan | EMRO | [PHC/COVID](https://ahpsr.who.int/publications/i/item/jordan-a-primary-health-care-case-study-in-the-context-of-the-covid-19-pandemic) | 42 | 41 | 14.18 | 12.56 | 16.49 | 14.6 | <0.1 | <0.1 | 47.7 | 2.3 | 8.7 |
| 15 | Kazakhstan | EURO | SRHR draft | 13 | 13 | 9.36 | 9.14 | 10.52 | 10.27 | no data | | 45.4 | 18.4 | 11.3 |
| 16 | Kenya | AFRO | [PRIMASYS](https://apps.who.int/iris/handle/10665/341074) & [PHC/COVID](https://ahpsr.who.int/publications/i/item/kenya-a-primary-health-care-case-study-in-the-context-of-the-covid-19-pandemic) & SRHR draft | 490 | 530 | 31.56 | 27.99 | 42.41 | 37.15 | 4.9 | 3.7 | 25.1 | 19.4 | 12.8 |
| 17 | Lao PDR | WPRO | [PHC/COVID](https://iris.who.int/bitstream/handle/10665/372688/9789240076709-eng.pdf?sequence=1) | 166 | 126 | 39.07 | 34.22 | 49.39 | 42.51 | 0.3 | 0.4 | 29.8 | 10.2 | 2.4 |
| 18 | Lebanon | EMRO | [PRIMASYS](https://apps.who.int/iris/handle/10665/341171) & [PHC/COVID](https://ahpsr.who.int/publications/i/item/lebanon-a-primary-health-care-case-study-in-the-context-of-the-covid-19-pandemic) | 19 | 21 | 7.72 | 7.05 | 9.01 | 8.24 | <0.1 | <0.1 | 57.6 | 3.7 | 29.9 |
| 19 | Malaysia | WPRO | [PHC/COVID](https://ahpsr.who.int/publications/i/item/malaysia-a-primary-health-care-case-study-in-the-context-of-the-covid-19-pandemic) | 22 | 21 | 6.94 | 6.46 | 8.11 | 7.56 | 0.4 | 0.3 | 53.5 | 11.1 | 12.9 |
| 20 | Mexico | PAHO | [PRIMASYS](https://apps.who.int/iris/handle/10665/341062) | 52 | 59 | 13.05 | 11.4 | 15.17 | 13.24 | 0.4 | 0.4 | 45.4 | 14.3 | 42.4 |
| 21 | Mongolia | WPRO | [PRIMASYS](https://apps.who.int/iris/handle/10665/341092) & [PHC/COVID](https://ahpsr.who.int/publications/i/item/mongolia-a-primary-health-care-case-study-in-the-context-of-the-covid-19-pandemic) | 48 | 39 | 15.12 | 12.68 | 17.61 | 14.7. | <0.1 | <0.1 | 11.3 | 20.1 | 2.2 |
| 22 | Morocco | EMRO | [PHC/COVID](https://ahpsr.who.int/publications/i/item/morocco-a-primary-health-care-case-study-in-the-context-of-the-covid-19-pandemic) | 80 | 72 | 18.29 | 15.42 | 21.32 | 18 | <0.1 | <0.1 | 63.2 | 11.6 | 24.2 |
| 23 | Myanmar | SEARO | [PHC/COVID](https://ahpsr.who.int/publications/i/item/myanmar-a-primary-health-care-case-study-in-the-context-of-the-covid-19-pandemic) | 238 | 179 | 38.15 | 33.72 | 48.07 | 41.81 | 0.9 | 0.9 | 24.5 | 25.3 | 3.1 |
| 24 | New Zealand | WPRO | SRHR draft | 7 | 7 | 4.32 | 3.94 | 5.19 | 4.73 | <0.1 | <0.1 | 149.3 | 7.1 | 166.1 |
| 25 | Nigeria | AFRO | [PRIMASYS](https://apps.who.int/iris/handle/10665/341137) | 1127 | 1047 | 77.05 | 70.59 | 122.4 | 110.8 | no data | | 27.9 | 11.9 | 14.7 |
| 26 | Pakistan | EMRO | [PRIMASYS](https://apps.who.int/iris/handle/10665/341143) & [PHC/COVID](https://ahpsr.who.int/publications/i/item/pakistan-a-primary-health-care-case-study-in-the-context-of-the-covid-19-pandemic) | 177 | 154 | 58.99 | 52.78 | 71.77 | 63.33 | 0.1 | 0.2 | 24.2 | 4.7 | 4 |
| 27 | Peru | PAHO | [PRIMASYS](https://apps.who.int/iris/handle/10665/341085) | 61 | 69 | 12.18 | 10.96 | 15.69 | 14.12 | 0.3 | 0.4 | 41.3 | 25.7 | 53.1 |
| 28 | Philippines | WPRO | [PHC/COVID](https://ahpsr.who.int/publications/i/item/philippines-a-primary-health-care-case-study-in-the-context-of-the-covid-19-pandemic) | 84 | 78 | 22.7 | 20.47 | 28.69 | 25.74 | <0.1 | 0.3 | 49.8 | 14.5 | 15 |
| 29 | Qatar | EMRO | [PHC/COVID](https://ahpsr.who.int/publications/i/item/qatar-a-primary-health-care-case-study-in-the-context-of-the-covid-19-pandemic) | 6 | 8 | 5.92 | 4.54 | 6.92 | 5.31 | <0.1 | <0.1 | 30.5 | 3.2 | 4.8 |
| 30 | Rwanda | AFRO | [PRIMASYS](https://apps.who.int/iris/handle/10665/341181) | 275 | 259 | 32.91 | 29.65 | 44.63 | 39.44 | 3.2 | 2.3 | 18.8 | 18.7 | 16.6 |
| 31 | Singapore | WPRO | [PHC/COVID](https://ahpsr.who.int/publications/i/item/singapore-a-primary-health-care-case-study-in-the-context-of-the-covid-19-pandemic) | 7 | 7 | 2.16 | 1.73 | 2.65 | 2.09 | no data | | 131.3 | 11.1 | 60.3 |
| 32 | South Africa | AFRO | [PRIMASYS](https://apps.who.int/iris/bitstream/handle/10665/341145/WHO-HIS-HSR-17.38-eng.pdf?sequence=1&isAllowed=y) & [PHC/COVID](https://ahpsr.who.int/publications/i/item/south-africa-a-primaryhealth-care-case-studyin-the-context-of-thecovid-19-pandemic) | 133 | 127 | 28.31 | 26.43 | 35.82 | 32.85 | 18.7 | 17.8 | 51.5 | 35.6 | 45 |
| 33 | Sri Lanka | SEARO | [PRIMASYS](https://apps.who.int/iris/handle/10665/341087) | no data | | 6.78 | 5.77 | 7.93 | 6.75 | <0.1 | <0.1 | 35.7 | 12.6 | 8.7 |
| 34 | Sudan | EMRO | [PHC/COVID](https://ahpsr.who.int/publications/i/item/sudan-a-primary-health-care-case-study-in-the-context-of-the-covid-19-pandemic) | 290 | 270 | 43.08 | 38.95 | 62.12 | 54.9 | 0.1 | 0.1 | 29 | 5.6 | 6.6 |
| 35 | Thailand | SEARO | [PRIMASYS](https://apps.who.int/iris/handle/10665/341061) & SRHR draft | 280 | 238 | 8.44 | 7.1 | 9.85 | 8.29 | 1.4 | 1.1 | 13.4 | 34.3 | 11.9 |
| 36 | Timor-Leste | SEARO | [PHC/COVID](https://ahpsr.who.int/publications/i/item/timor-leste-a-primary-health-care-case-study-in-the-context-of-the-covid-19-pandemic) | 29 | 29 | 48.57 | 43.08 | 57.69 | 50.55 | 0.1 | 0.2 | 61.8 | 25.6 | 25.4 |
| 37 | Tunisia | EMRO | SRHR draft | 256 | 204 | 14.66 | 14.03 | 17.06 | 16.32 | <0.1 | <0.1 | 18.2 | 10 | 4.5 |
| 38 | Uganda | AFRO | [PRIMASYS](https://apps.who.int/iris/handle/10665/341064) | 38 | 37 | 35.95 | 31.17 | 50.17 | 42.13 | 6 | 5.1 | 51.9 | 5.7 | 20.2 |
| 39 | United Arab Emirates | EMRO | [PHC/COVID](https://ahpsr.who.int/publications/i/item/united-arab-emirates-a-primary-health-care-case-study-in-the-context-of-the-covid-19-pandemic) | 9 | 9 | 6.17 | 5.45 | 7.21 | 6.37 | <0.1 | <0.1 | 11.4 | 30 | 10.5 |
| 40 | United Republic of Tanzania | AFRO | [PRIMASYS](https://apps.who.int/iris/handle/10665/341165) | 313 | 284 | 38.22 | 34.11 | 53.9 | 47.12 | 5.3 | 4.3 | 33.7 | 4 | 3.9 |
| 41 | Uruguay | PAHO | SRHR draft | 16 | 19 | 6.79 | 4.99 | 7.9 | 5.82 | 0.5 | 0.6 | 105.4 | 15.2 | 92 |
| 42 | Viet Nam | WPRO | [PHC/COVID](https://ahpsr.who.int/publications/i/item/viet-nam-a-primary-health-care-case-study-in-the-context-of-the-covid-19-pandemic) | 52 | 46 | 17.13 | 16.43 | 21.46 | 20.6 | 0.4 | 0.3 | 44.2 | 8.5 | 2.9 |

Sources: The Global Health Observatory. Geneva: World Health Organization.<https://www.who.int/data/gho> [accessed 2023 Dec 13]; International Agency for Research on Cancer. Geneva: World Health Organization.<https://www.iarc.who.int/> [accessed 2023 Dec 13].

**Supplementary file 2: Coding and analysis matrix**

| **Level 1 SRHR theme** | |
| --- | --- |
| Reproductive health  Family planning  Abortion  HIV and STI services  Reproductive cancers  Sexual and reproductive health education  Gender  Rights and Advocacy | |
| **Level 1 PHC theme** | |
| ***Terms used during coding*** | ***Associated PHC levers used for analysis*** |
| Access | Models of care |
| Acceptability | Not enough data |
| Clinical practice guidelines | Systems for improving quality of care |
| Coverage (products) | Medicines and other health products |
| Funding | Funding and allocation of resources |
| Infrastructure | Not enough data |
| Model of care | Models of care |
| Outcomes | Included in corresponding SRHR sections |
| Prevention | Included in Models of care |
| Quality of care | Not enough data |
| Rights | Covered in rights section |
| Role of NGOs | Included in Funding and allocation of resources |
| Safety | Not enough data |
| Screening | Included in Models of care |
| Services/Service package | Purchasing and payment systems |
| Strategy | Governance |
| Supplies | Included in Medicines and other health products |
| Telemedicine | Digital health |
| Unmet needs | Included in corresponding SRHR sections |
| Utilization | Included in corresponding SRHR sections |
| Workforce, health workforce competencies | Primary health care workforce |

**Supplementary file 3: Mapping of illustrative policy interventions**

| **Theme** | **Structures** | **Inputs** | **Processes** |
| --- | --- | --- | --- |
| **Maternal and child health** | **Governance**  Dedicated national programmes on prenatal care, labour and delivery (Colombia, Ethiopia, Georgia, Ghana, South Africa, Sri Lanka, Rwanda, Tanzania)  Emergency number for women in labour during curfew hours during the pandemic to access licensed taxi drivers compensated by government (Kenya)  **Adjustment to population health needs**  None    **Financing**  Voucher scheme for services, both public and private (Pakistan)  Most countries describe a mix of public and private funding to various proportions (Cameroun, Democratic Republic of the Congo, Lao PDR, New Zealand, South Africa, Peru, Philippines, Tanzania)  Free antenatal, delivery and newborn care (Colombia, Kazakhstan, Kenya, Lao PDR, Lebanon) | **Physical infrastructure**  None  **Health workforce**  Online training of personnel on management of pregnancy, childbirth and postpartum care during the pandemic (Morocco)    **Medicines and other health products**  None  **Health information**  None    **Digital technologies for health**  Use of telemedicine and face-to-face appointments with ICP measures during the pandemic (Indonesia) | **Models of care**  Nurse and midwife-led care (South Africa, Tunisia)  Interventions to reduce face-to-face antenatal care visits for low-risk pregnancies during the pandemic (UAE)  **Systems for improving quality of care**  Development of clinical practice guidelines (Mexico, South Africa)    **Resilient health facilities and services**  None |
| **Family planning** | **Governance**  “Two Is Enough” campaign to promote smaller family sizes (Egypt)  Programmes targeting contraception use among women in the first year after pregnancy (Kenya)  Family planning vouchers for private providers (Pakistan)  **Adjustments to population health needs**  None  **Financing**  Targeted financing to increase youth access to family planning (Thailand)  Expanded service package for free access to contraceptives (Colombia, Kazakhstan, Uruguay) | **Physical infrastructure**  Computerized logistics management system (Pakistan)    **Health workforce**  None  **Medicines and other health products**  Expanded service package for free access to contraceptives (Colombia, Kazakhstan, Uruguay)  Protecting contraceptives supply chain during the pandemic (Morocco, Myanmar)    **Health information**  None    **Digital technologies for health**  Computerized logistics management system (Pakistan) | **Models of care**  Family planning integrated into PHC facilities (DRC)  Integration of family planning within postnatal care (Egypt)    **Systems for improving quality of care**  None    **Resilient health facilities and services**  None |
| **Abortion** | **Governance**  Expansion of rights for the voluntary termination of pregnancy (New Zealand, Thailand, Uruguay)    **Adjustments to population health needs**  None    **Financing**  Covering abortion procedures, including medication used for medical abortion (Thailand, Uruguay) | **Physical infrastructure**  None    **Health workforce**  Midwife-administered medication (Tunisia)  Trained specialists (Kazakhstan)    **Medicines and other health products**  Covering abortion procedures, including medication used for medical abortion (Thailand, Uruguay)    **Health information**  None    **Digital technologies for health**  None | **Models of care**  Comprehensive sexuality education targeting teenagers (Dominica)  Improving public information access (Kazakhstan)  Midwife-administered medication (Tunisia)  **Systems for improving quality of care**  Clinical protocols for abortion services (DRC, Kazakhstan, New Zealand)    **Resilient health facilities and services**  None |
| **HIV/STIs** | **Governance**  “Test and treat” (90-90-90) strategy *(37)*  High-level policy prioritization of prevention and control (Ethiopia, Indonesia)  Development of provincial recovery plans including a focus on HIV testing, treatment, and vial suppression during the pandemic *(37)*    **Adjustments to population health needs**  None    **Financing**  Domain accounting for most donor funds in low private funding countries for health services (South Africa, Peru)  Donors support for testing, treatment and counseling (Kenya, Pakistan, Rwanda)  Coverage of HIV screening and prevention of mother-to-child transmission (Cameroon, South Africa) | **Physical infrastructure**  None  **Health workforce**  Leveraging village health volunteers in HIV prevention and control efforts (Thailand)  **Medicines and other health products**  Efforts made to increase access and coverage of antiretroviral therapy (Peru, South Africa, Tanzania)  Use of rapid diagnostic tests in primary care (Peru)  **Health information**  None    **Digital technologies for health**  Donor supported expansion and enhancement of virtual modes of service delivery, including HIV counseling, during the pandemic (Dominica) | **Models of care**  One-stop model to STI prevention, HIV screening and therapy and mental health services (Philippines)  Use of rapid diagnostic tests in primary care (Peru)  Integration of HIV/AIDS with cervical cancer screening (Kenya)  Donor supported expansion and enhancement of virtual modes of service delivery, including HIV counseling, during the pandemic (Dominica)    **Systems for improving quality of care**  None  **Resilient health facilities and services**  None |
| **Reproductive cancers** | **Governance**  Wellness promotion programmes (Dominica)  Regulations and national programmes targeting one or more cancer(s) (Colombia, Georgia, Mexico, Singapore)    **Adjustments to population health needs**  None    **Financing**  Targeted financial incentives (Thailand) | **Physical infrastructure**  None    **Health workforce**  Integrated screening services at PHC facilities (Kenya, Tunisia)    **Medicines and other health products**  None  **Health information**  None    **Digital technologies for health**  None | **Models of care**  Integrated screenings into basic package of services for delivery at PHC centers (Kenya, Tunisia, Thailand)  **Systems for improving quality of care**  Clinical practice guidelines (Mexico, UAE)  **Resilient health facilities and services**  None |
| **Sexual and reproductive education** | **Governance**  None    **Adjustments to population health needs**  None    **Financing**  International development partners playing important role in training agenda and development of clinical practice manuals (Kenya, Lebanon) | **Physical infrastructure**  None    **Health workforce**  In-service training and continuous professional development for PHC healthcare professionals on HIV management, gender-based violence, emergency obstetric and neonatal care (Kenya, Lebanon, Vietnam)  Closure of nursing schools creates underproduction which increases nurse shortages *(37)*    **Medicines and other health products**  None    **Health information**  None    **Digital technologies for health**  Development of resources for workforce training related to national guidelines for antenatal, postnatal and pre-conception services, cervical cancer, and child development and protection; recorded and prepared online (Morocco, UAE) | **Models of care**  Comprehensive Sexuality Education with a focus on: contraceptives, safe abortion, reproductive health problems and comprehensive knowledge of HIV/AIDS and STIs (Egypt, Lao PDR, Mexico, Thailand)  Increased targeted services for vulnerable groups, in particular youth/adolescents, women with disabilities (Egypt, Indonesia, Kazakhstan, Kenya)  **Systems for improving quality of care**  Development of resources for workforce training related to national guidelines for antenatal, postnatal and pre-conception services, cervical cancer, and child development and protection; recorded and prepared online (Morocco, UAE)    **Resilient health facilities and services**  None |
| **Gender** | **Governance**  Improvements in constitutional rights of women including to education and healthcare services (Dominica, Egypt, Kazakhstan, New Zealand, Sri Lanka, Tunisia)  “Kazakhstan Free from Domestic Violence Project” assisting victims of violence through crisis centers (Kazakhstan)  ‘Shyrak’ Public Association formed by women with disabilities addressing gap in sexual education for women and girls with disabilities (Kazakhstan)  Multisectoral programme to prevent gender-based violence (Kenya)  Support from development partners to protect children and victims of gender-based violence during the pandemic (Lebanon, Morocco)    **Adjustments to population health needs**  None    **Financing**  None | **Physical infrastructure**  None    **Health workforce**  Training workforce on gender-based violence and capacity to support survivors (Kenya, Kazakhstan, Lebanon)    **Medicines and other health products**  None    **Health information**  None    **Digital technologies for health**  None | **Models of care**  None    **Systems for improving quality of care**  Training workforce on gender-based violence and capacity to support survivors (Kenya, Kazakhstan, Lebanon)    **Resilient health facilities and services**  None |
| **Rights** | **Governance**  Advocating for and protecting in particular the rights of children, adolescents, HIV-affected persons, sex workers, women with disabilities, and the LGBTQ+ community (Colombia, Kazakhstan, Sri Lanka, Peru, Tunisia, Uruguay)  Rights-based policies and new legislation (DRC, Dominica, Egypt, Kazakhstan, Kenya, New Zealand, Thailand, Tunisia, Uruguay)  Laws to advance the right to the voluntary termination of pregnancy *(38)*  Legal safeguards to protect women and children against Female Genital Mutilation and legislation to protect women’s rights and safety (Kenya, Tunisia)  **Adjustments to population health needs**  None    **Financing**  None | **Physical infrastructure**  None    **Health workforce**  None    **Medicines and other health products**  None    **Health information**  None    **Digital technologies for health**  None | **Models of care**  None    **Systems for improving quality of care**  None    **Resilient health facilities and services**  None |
